# Supplementary material
Source: publisher figshare collection journal article supplement (https://asha.figshare.com/articles/dataset/_/13158185)
Supplement: Supplementary file 1 [file 1]

# Story Friends LISTENING CENTER OBSERVATION CHECKLIST

Classroom \_\_\_\_\_ Facilitator ID \_\_\_\_\_ Date: \_\_\_\_\_

Book \_\_\_\_\_ Observer ID \_\_\_\_\_

**Scoring:** 2 = happens often, 1 = happens sometimes, 0 = did not happen; N/A = not applicable. Record additional notes below.

| IN ALL CLASSROOMS                                                                                                                                                                               |                                                           |                                 |                                                                                                                                        |                                                                                                   |  |
|-------------------------------------------------------------------------------------------------------------------------------------------------------------------------------------------------|-----------------------------------------------------------|---------------------------------|----------------------------------------------------------------------------------------------------------------------------------------|---------------------------------------------------------------------------------------------------|--|
| Adheres to the Daily Structure of the Listening Center through the following                                                                                                                    |                                                           |                                 |                                                                                                                                        |                                                                                                   |  |
| Y / N                                                                                                                                                                                           | Each child had headphones.                                |                                 |                                                                                                                                        |                                                                                                   |  |
| Y / N                                                                                                                                                                                           | Each child had a book.                                    |                                 |                                                                                                                                        |                                                                                                   |  |
| Y / N                                                                                                                                                                                           | Facilitator had headphones.                               |                                 |                                                                                                                                        |                                                                                                   |  |
| Y / N                                                                                                                                                                                           | Correct audio was playing and functioning properly.       |                                 |                                                                                                                                        |                                                                                                   |  |
| Y / N                                                                                                                                                                                           | Entire audio was played.                                  |                                 |                                                                                                                                        |                                                                                                   |  |
| Y / N                                                                                                                                                                                           | Listening center setting was quiet with few distractions. |                                 |                                                                                                                                        |                                                                                                   |  |
| Interruptions and Additional Instruction                                                                                                                                                        |                                                           |                                 |                                                                                                                                        |                                                                                                   |  |
| 2                                                                                                                                                                                               | 1                                                         | 0                               | Facilitator interrupts or talks over audio.                                                                                            |                                                                                                   |  |
| 2                                                                                                                                                                                               | 1                                                         | 0                               | Facilitator stops audio.                                                                                                               |                                                                                                   |  |
| 2                                                                                                                                                                                               | 1                                                         | 0                               | Facilitator provides additional instruction on vocabulary words. Circle: During the Story After the Story                              |                                                                                                   |  |
| 2                                                                                                                                                                                               | 1                                                         | 0                               | Facilitator asks additional questions about the story.                                                                                 |                                                                                                   |  |
| <input type="checkbox"/> pre-story questions<br><input type="checkbox"/> repeating embedded lesson<br><input type="checkbox"/> supplemental activities<br><input type="checkbox"/> other: _____ |                                                           |                                 | <input type="checkbox"/> post-story questions<br><input type="checkbox"/> prompting<br><input type="checkbox"/> story retell<br>Notes: |                                                                                                   |  |
| Overall Use of Positive Encouragement Techniques                                                                                                                                                |                                                           |                                 |                                                                                                                                        |                                                                                                   |  |
| 2                                                                                                                                                                                               | 1                                                         | 0                               | Facilitator praises or encourages (verbal, nonverbal) appropriate behavior when appropriate.                                           |                                                                                                   |  |
| 2                                                                                                                                                                                               | 1                                                         | 0                               | N/A                                                                                                                                    | Facilitator ignores or redirects distracting behavior when required.                              |  |
| 2                                                                                                                                                                                               | 1                                                         | 0                               | N/A                                                                                                                                    | Facilitator assists children in staying on the correct page when necessary.                       |  |
| Child Engagement                                                                                                                                                                                | Interfering<br>Rarely On Task                             | Distracted<br>Sometimes On Task | Engaged<br>Often On Task                                                                                                               | Notes:                                                                                            |  |
| ID:                                                                                                                                                                                             |                                                           |                                 |                                                                                                                                        |                                                                                                   |  |
| IN TREATMENT CLASSROOMS ONLY                                                                                                                                                                    |                                                           |                                 |                                                                                                                                        |                                                                                                   |  |
| First Embedded Lesson                                                                                                                                                                           |                                                           |                                 |                                                                                                                                        |                                                                                                   |  |
| 2                                                                                                                                                                                               | 1                                                         | 0                               | N/A                                                                                                                                    | Facilitator provides cue for attention (e.g., point to headphones, says "Listen") when necessary. |  |
| 2                                                                                                                                                                                               | 1                                                         | 0                               |                                                                                                                                        | Facilitator models appropriate responding (e.g., repeats word).                                   |  |
| 2                                                                                                                                                                                               | 1                                                         | 0                               |                                                                                                                                        | Facilitator encourages and/or praises responding when appropriate.                                |  |
| Second Embedded Lesson                                                                                                                                                                          |                                                           |                                 |                                                                                                                                        |                                                                                                   |  |
| 2                                                                                                                                                                                               | 1                                                         | 0                               | N/A                                                                                                                                    | Facilitator provides cue for attention (e.g., point to headphones, says "Listen") when necessary. |  |
| 2                                                                                                                                                                                               | 1                                                         | 0                               |                                                                                                                                        | Facilitator models appropriate responding (e.g., repeats word).                                   |  |
| 2                                                                                                                                                                                               | 1                                                         | 0                               |                                                                                                                                        | Facilitator encourages and/or praises responding when appropriate.                                |  |
| Third Embedded Lesson                                                                                                                                                                           |                                                           |                                 |                                                                                                                                        |                                                                                                   |  |
| 2                                                                                                                                                                                               | 1                                                         | 0                               | N/A                                                                                                                                    | Facilitator provides cue for attention (e.g., point to headphones, says "Listen") when necessary. |  |
| 2                                                                                                                                                                                               | 1                                                         | 0                               |                                                                                                                                        | Facilitator models appropriate responding (e.g., repeats word).                                   |  |
| 2                                                                                                                                                                                               | 1                                                         | 0                               |                                                                                                                                        | Facilitator encourages and/or praises responding when appropriate.                                |  |
| Fourth Embedded lesson                                                                                                                                                                          |                                                           |                                 |                                                                                                                                        |                                                                                                   |  |
| 2                                                                                                                                                                                               | 1                                                         | 0                               | N/A                                                                                                                                    | Facilitator provides cue for attention (e.g., point to headphones, says "Listen") when necessary. |  |
| 2                                                                                                                                                                                               | 1                                                         | 0                               |                                                                                                                                        | Facilitator models appropriate responding (e.g., repeats word).                                   |  |
| 2                                                                                                                                                                                               | 1                                                         | 0                               |                                                                                                                                        | Facilitator encourages and/or praises responding when appropriate.                                |  |
| Post-Story Lessons                                                                                                                                                                              |                                                           |                                 |                                                                                                                                        |                                                                                                   |  |
| 2                                                                                                                                                                                               | 1                                                         | 0                               | N/A                                                                                                                                    | Facilitator provides cue for attention (e.g., point to headphones, says "Listen") when necessary. |  |
| 2                                                                                                                                                                                               | 1                                                         | 0                               |                                                                                                                                        | Facilitator models appropriate responding (e.g., repeats word).                                   |  |
| 2                                                                                                                                                                                               | 1                                                         | 0                               |                                                                                                                                        | Facilitator encourages and/or praises responding when appropriate.                                |  |
| Notes:                                                                                                                                                                                          |                                                           |                                 |                                                                                                                                        |                                                                                                   |  |

# Story Friends

## LISTENING CENTER OBSERVATION NOTES

Classroom\_\_\_\_\_Participant IDs \_\_\_\_\_

Observer ID \_\_\_\_\_

Facilitator ID \_\_\_\_\_

| OBSERVATION NOTES                                         |
|-----------------------------------------------------------|
| Structure and Organization of Listening Center Activities |
|                                                           |
| Encouragement and Modeling                                |
|                                                           |
| Other Notes                                               |
|                                                           |
